# Supplementary material for: Triple helix and rod structures of the antiseptic drug bibrocathol revealed by electron crystallography
Source: Royal Society of Chemistry journal article supplement (doi:10.1039/d2cc04209f), 2022-01-01
Supplement: d2cc04209f1.pdf [file d2cc04209f1.pdf]

Triple helix and rod structures of the antiseptic drug  
bibrocathol revealed by electron crystallography

## **Electronic Supplementary Information**

Erik Svensson Grape<sup>\*a</sup>, Tom Willhammar<sup>a</sup>, A. Ken Inge<sup>a</sup>

<sup>a</sup>*Department of Materials and Environmental Chemistry, Stockholm University, SE-106 91, Sweden*

## Powder X-Ray Diffraction Studies

In-house PXRD measurements were carried out using a Panalytical X'pert Pro diffractometer (Cu  $K\alpha_{1,2}$ ,  $\lambda_1 = 1.540598 \text{ \AA}$ ,  $\lambda_2 = 1.544426 \text{ \AA}$ ) using a Bragg–Brentano geometry, loading the samples on zero-background Si plates. Variable temperature experiments were carried out using an Anton Paar XRK 900 high-temperature chamber, connected to a rotation pump. The Pawley fit against PXRD data was carried out using TOPAS Academic V6.<sup>1</sup>

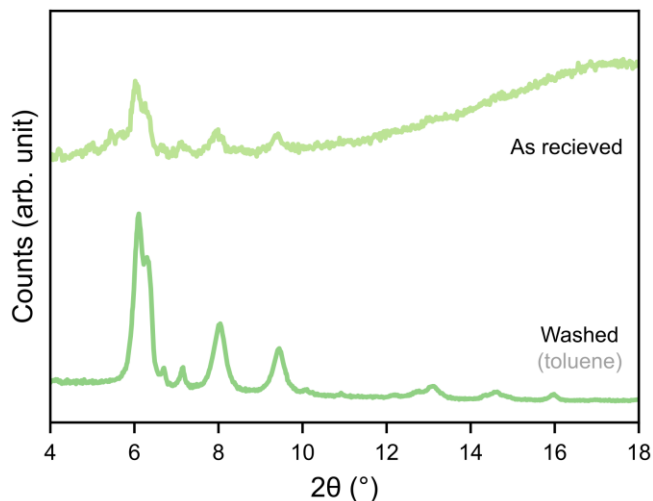

**Fig. S1.** Measured powder X-ray diffraction patterns of as-received bibrocathol formulation as an ointment and the solid obtained after washing the product with toluene ( $\lambda_1 = 1.540598 \text{ \AA}$ ,  $\lambda_2 = 1.544426 \text{ \AA}$ ).

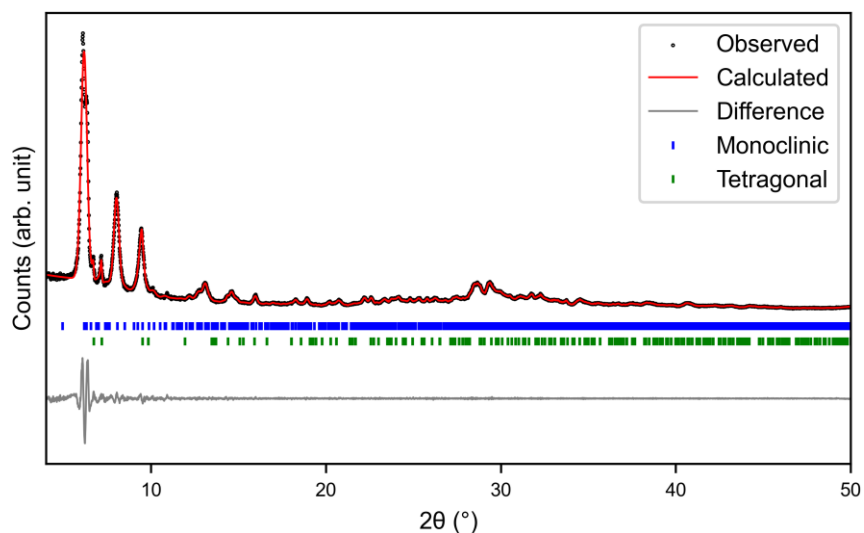

**Fig. S2.** Plot for the Pawley fit of both the monoclinic and tetragonal phases of bibrocathol. The data were collected using Cu  $K\alpha$  radiation ( $\lambda_1 = 1.540598 \text{ \AA}$ ,  $\lambda_2 = 1.544426 \text{ \AA}$ ).

**Table S1.** Crystallographic table for the Pawley fit of bibrocathol against PXRD data using the unit cells acquired from the 3DED measurements (Table S2).

|                          |                                                                                                |
|--------------------------|------------------------------------------------------------------------------------------------|
| Crystal system           | <b>Monoclinic</b>                                                                              |
| Space group              | <i>P2<sub>1</sub>/n</i> (No. 14)                                                               |
| Unit cell dimensions     | <i>a</i> = 16.48(7) Å<br><i>b</i> = 26.91(9) Å<br><i>c</i> = 24.08(3) Å<br>$\beta$ = 96.6(2) ° |
| Volume (Å <sup>3</sup> ) | 10610(62) Å <sup>3</sup>                                                                       |
| Crystal system           | <b>Tetragonal</b>                                                                              |
| Space group              | <i>I4<sub>1</sub>/a</i> (No. 88)                                                               |
| Unit cell dimensions     | <i>a</i> = 26.27(2) Å<br><i>c</i> = 13.90(2) Å                                                 |
| Volume (Å <sup>3</sup> ) | 9591(16) Å <sup>3</sup>                                                                        |
| Wavelength               | $\lambda_1$ = 1.540598 Å<br>$\lambda_2$ = 1.544426 Å                                           |
| Refinement method        | Pawley                                                                                         |
| Refinement statistics    | $R_{wp}$ = 4.14 %<br>GOF = 2.03                                                                |

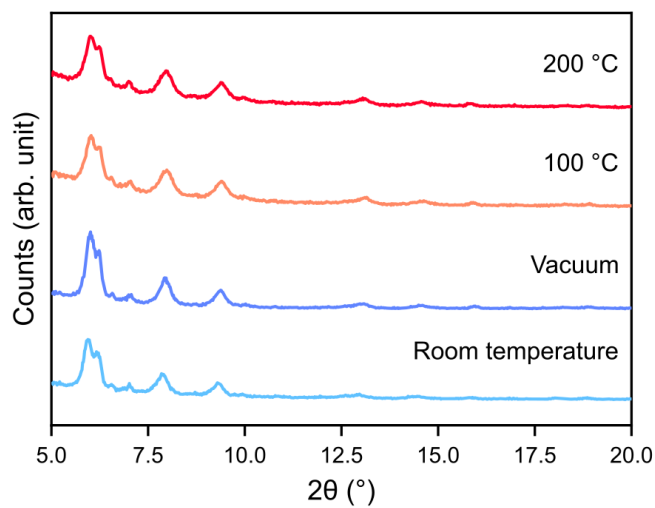

**Fig. S3.** Variable temperature powder X-ray diffraction patterns of bibrocathol, collected under reduced pressure (approximately 0.5 mbar,  $\lambda_1$  = 1.540598 Å,  $\lambda_2$  = 1.544426 Å).

### 3D electron diffraction (3DED)

The sample was prepared by sprinkling toluene-washed bibrocathol (obtained from a formulation of Noviform® 5%) onto holey carbon grids. Three-dimensional electron diffraction data were collected using a JEOL JEM2100 TEM, equipped with a Timepix detector from Amsterdam Scientific Instruments, while continuously rotating the crystals at  $0.45^\circ \text{ s}^{-1}$ . The experiment was carried out using Instamatic,<sup>2</sup> with data reduction and merging (5 datasets for the monoclinic phase and 7 datasets for the tetragonal phase) being performed in XDS.<sup>3</sup> The acquired intensities were then used to solve the structure of each phase using SHELXT,<sup>4</sup> and refined using SHELXL,<sup>5</sup> with electron scattering factors as previously published by Peng.<sup>6</sup> From the 3DED data, all non-hydrogen atoms could be located in the initial structure solution using the program SHELXT.

**Table S2.** Crystallographic table of 3DED data and the refinement of the **Monoclinic** (5 crystals) and **Tetragonal** (7 crystals) phases of bibrocathol.

| Compound                           | Monoclinic                                                                            | Tetragonal                                                           |
|------------------------------------|---------------------------------------------------------------------------------------|----------------------------------------------------------------------|
| Chemical formula                   | $\text{C}_{60}\text{Bi}_{10}\text{Br}_{40}\text{O}_{25}$                              | $\text{C}_{12}\text{BiBr}_8\text{O}_5$                               |
| Formula weight                     | 6406.59 g mol <sup>-1</sup>                                                           | 1072.34 g mol <sup>-1</sup>                                          |
| Temperature                        | 293(2) K                                                                              | 293(2) K                                                             |
| Wavelength                         | 0.0251 Å                                                                              | 0.0251 Å                                                             |
| Crystal system                     | Monoclinic                                                                            | Tetragonal                                                           |
| Space group                        | $P2_1/n$ (No. 14)                                                                     | $I4_1/a$ (No. 88)                                                    |
| Unit cell dimensions               | $a = 17.01(9)$ Å<br>$b = 27.26(14)$ Å<br>$c = 26.21(13)$ Å<br>$\beta = 94.7(2)^\circ$ | $a = 25.16(13)$ Å<br>$c = 13.98(7)$ Å                                |
| Volume                             | 12113(105) Å <sup>3</sup>                                                             | 8850(99) Å <sup>3</sup>                                              |
| Z                                  | 4                                                                                     | 16                                                                   |
| Density (calc.)                    | 3.513 g cm <sup>-3</sup>                                                              | 3.219 g cm <sup>-3</sup>                                             |
| Index ranges                       | $-19 \leq h \leq 19$<br>$-31 \leq k \leq 30$<br>$-29 \leq l \leq 29$                  | $-27 \leq h \leq 30$<br>$-27 \leq k \leq 30$<br>$-16 \leq l \leq 16$ |
| Reflections collected              | 120385                                                                                | 83501                                                                |
| Completeness                       | 89.8 % (0.86 Å)                                                                       | 99.4 % (0.83 Å)                                                      |
| Independent reflections            | 18190<br>[R(int) = 0.2785]                                                            | 4171<br>[R(int) = 0.5154]                                            |
| Data / restr. / param.             | 18190 / 12 / 481                                                                      | 4171 / 76 / 237                                                      |
| Goodness-of-fit on $F^2$           | 1.114                                                                                 | 1.120                                                                |
| Final R index [ $I > 4\sigma(I)$ ] | R1 = 0.2346                                                                           | R1 = 0.2111                                                          |

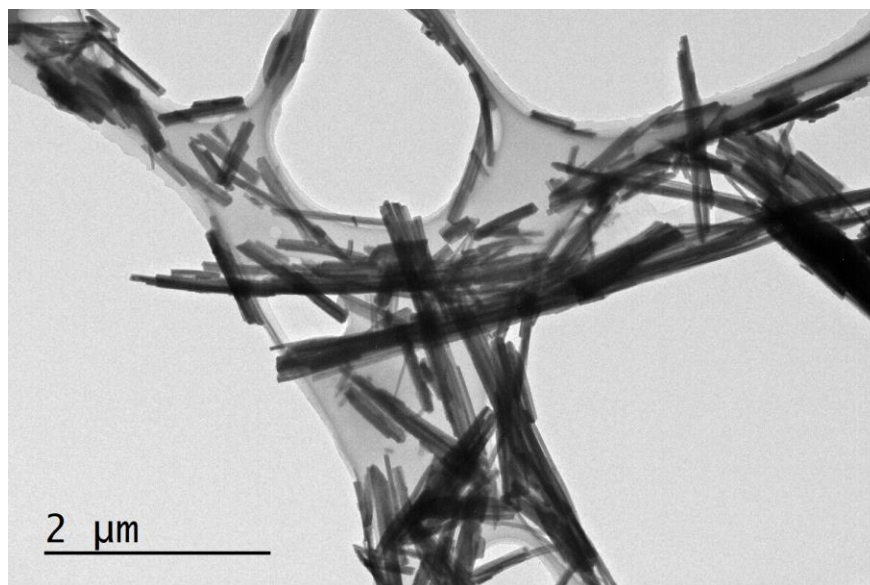

**Fig. S4.** Brightfield transmission electron microscopy image of aggregated bibrocathol crystals, showing a polydisperse distribution of crystals having a plank-shaped morphology.

### Elemental analysis

The elemental analysis was performed by Medac Ltd (United Kingdom) on the same toluene-washed sample that was used for the 3D ED measurements. The results showed a larger than expected carbon and hydrogen content as well as a lower than expected bromine and bismuth content, likely owing to the presence of residual petroleum oil that was not fully washed away.

**Table S3.** Elemental analysis of toluene-washed bibrocathol.

| Element                        | C (wt. %) | H (wt. %) | N (wt. %) | Br (wt. %) | Bi (wt. %) | Weight ratio, Br:Bi |
|--------------------------------|-----------|-----------|-----------|------------|------------|---------------------|
| Observed                       | 21.47     | 2.34      | <0.10     | 37.84      | 26.54      | 1.42                |
| Expected,<br><b>monoclinic</b> | 11.25     | 0         | 0         | 49.89      | 32.62      | 1.53                |
| Expected,<br><b>tetragonal</b> | 13.40     | 0.28      | 0         | 59.44      | 19.43      | 3.06                |

## Supplemental references

- (1) Coelho, A. TOPAS-Academic V6. Coelho Software. 2016.
- (2) Cichocka, M. O.; Ångström, J.; Wang, B.; Zou, X.; Smeets, S. High-Throughput Continuous Rotation Electron Diffraction Data Acquisition via Software Automation. *J. Appl. Crystallogr.* **2018**, *51* (6), 1652–1661.
- (3) Kabsch, W. XDS. *Acta Crystallogr. Sect. D Biol. Crystallogr.* **2010**, *66* (2), 125–132.
- (4) Sheldrick, G. M. SHELXT - Integrated Space-Group and Crystal-Structure Determination. *Acta Crystallogr. Sect. A Found. Crystallogr.* **2015**, *71* (1), 3–8.
- (5) Sheldrick, G. M. A Short History of SHELX. *Acta Crystallogr. Sect. A Found. Crystallogr.* **2008**, *64* (1), 112–122.
- (6) Peng, L. M. Electron Atomic Scattering Factors and Scattering Potentials of Crystals. *Micron* **1999**, *30* (6), 625–648.
